# Supplementary material for: IRF3-mediated pathogenicity in a murine model of human hepatitis A
Source: PubMed Central journal article supplement (PMC8509855; doi:10.1371/journal.ppat.1009960), 2021-09-30
Supplement: ppat.1009960.s007.pdf [file ppat.1009960.s007.pdf]

**S2 Table. Antibodies and Other Reagents****Antibodies**

|                                     |                   |                |
|-------------------------------------|-------------------|----------------|
| Anti-IRF1                           | Cell Signaling    | Cat #8478      |
| IRF3                                | Cell Signaling    | Cat #4302      |
| Phospho-IRF3                        | Cell Signaling    | Cat #4947      |
| $\beta$ -Actin                      | Cell Signaling    | Cat #3700      |
| Cleaved Caspase-3                   | Cell Signaling    | Cat #9661S     |
| Phospho-NF-kB p65                   | Cell Signaling    | Cat # 3033     |
| IRF7                                | Invitrogen        | Cat # PA520280 |
| Rabbit IRDye 680 secondary antibody | LI-COR Bioscience | Cat #926-32211 |
| Rabbit IRDye 800 secondary antibody | LI-COR Bioscience | Cat #926-32212 |

**Chemical Reagents**

|                                      |                   |                  |
|--------------------------------------|-------------------|------------------|
| Tissue Extraction Reagent            | Invitrogen        | Cat #FNN0071     |
| Protease Inhibitor Cocktail          | Sigma-Aldrich     | Cat #P8340       |
| PhosSTOP                             | Sigma-Aldrich     | Cat #4906845001  |
| cOmplete Protease Inhibitor Cocktail | Roche             | Cat #11697498001 |
| SDS-PAGE gel                         | Bio-Rad           | Cat #4568086     |
| Precision Plus Protein Standards     | Bio-Rad           | Cat #1610347     |
| Odyssey blocking buffer              | LI-COR Bioscience | Cat #92770001    |
| RIPA buffer                          | ThermoFisher      | Cat #89900       |
| RnaseZap                             | Ambion            | Cat #AM9780      |
| TRIzol Reagent                       | Invitrogen        | Cat #15596026    |

**Commercial Assays**

|                                                 |             |                |
|-------------------------------------------------|-------------|----------------|
| QIAamp Viral RNA Mini Kit                       | Qiagen      | Cat #52906     |
| RNease Mini Kit                                 | Qiagen      | Cat #74160     |
| SuperScript III First-Strand Synthesis SuperMix | Invitrogen  | Cat #11752-050 |
| iTaq Universal SYBR Green Supermix              | Bio-Rad     | Cat #1725121   |
| Serum Alanine Aminotransferase Activity kit     | Elabscience | Cat #EBCK235M  |

**Primers**

|                 | <b>Forward (5'–3')</b>   | <b>Reverse (5'–3')</b>  |
|-----------------|--------------------------|-------------------------|
| <i>Ccl5</i>     | GCTGCTTTGCCTACCTCTCC     | TCGAGTGACAAACACGACTGC   |
| <i>Tnfa</i>     | CATCTTCTCAAATTCGAGTGACAA | TGGGAGTAGACAAGGTACAACCC |
| <i>Isg15</i>    | GGGGTAACGATTTCTCTG       | CATAGATGTTGCTGTGGC      |
| <i>Ifng</i>     | GGCAAAGGATGGTGACATGA     | ATCTCTTCCCCACCCGAAT     |
| <i>Ifnb</i>     | GATGACGGAGAAGATGCAGAAG   | ACCCAGTGCTGGAGAAATTG    |
| <i>Ifnl2</i>    | GTGCAGTTCCCACCTCTTCC     | GGCTGAGTCAGTCATGTTCTC   |
| <i>Ifnl3</i>    | GTGCAGTTCCCACCTCATCT     | GGCTGAGTCATTTATGTTCTC   |
| <i>Ifi27</i>    | TTGGAGAGGAACCTGCTTTG     | CCTTCCTTCTCTGCCTTCTT    |
| <i>Ifi27l2a</i> | CGTGACTGAAGACAGCCAATA    | CCTTCCATCACTGAGTGTTTCT  |
| <i>Ifi27l2b</i> | CACAGGAGCCTCCAAGTTATG    | GAACCAGTGCATCTTGGTACT   |
| <i>Actin</i>    | AGTGTGACGTTGACATCCGT     | TGCTAGGAGCCAGAGCAGTA    |
